# Supplementary material for: Lipid and DHA-production in Aurantiochytrium sp. – Responses to nitrogen starvation and oxygen limitation revealed by analyses of production kinetics and global transcriptomes
Source: PubMed Central journal article supplement (PMC6923395; doi:10.1038/s41598-019-55902-4), 2019-12-19
Supplement: 41598_2019_55902_MOESM1_ESM.pdf [file 41598_2019_55902_MOESM1_ESM.pdf]

Tonje M. B. Heggeset, Helga Ertesvåg, Bin Liu, Trond E. Ellingsen, Olav Vadstein, Inga Marie Aasen

**Lipid and DHA-production in *Aurantiochytrium* sp – Responses to nitrogen starvation and oxygen limitation revealed by analyses of production kinetics and global transcriptomes**

**Supplementary Tables, Figures and Methods**

**Table S1. Transcriptome data, expression as RPKM (reads per kilobase million), for the manually annotated genes**

| ID                                                          | Name                                                 | Abbr    | E    | RPKM |      |      | Fold difference |      |      |      |
|-------------------------------------------------------------|------------------------------------------------------|---------|------|------|------|------|-----------------|------|------|------|
|                                                             |                                                      |         |      | N1   | N2   | O    | N1/E            | N2/E | O/E  | O/N2 |
| <b>Glycerol uptake and conversion to glycerol phosphate</b> |                                                      |         |      |      |      |      |                 |      |      |      |
| T66001838.1                                                 | Glycerol uptake facilitator protein                  | GUP-1   | 0.6  | 46.5 | 15.1 | 0.6  | 83.8            | 27.2 | 1.0  | 0.0  |
| T66002465.1                                                 | Glycerol uptake facilitator protein                  | GUP-2   | 85   | 267  | 43   | 40   | 3.2             | 0.5  | 0.5  | 0.9  |
| T66010800.1                                                 | Glycerol uptake facilitator protein                  | GUP-3   | 10   | 14   | 84   | 20   | 1.4             | 8.0  | 1.9  | 0.2  |
| T66005684.1                                                 | Glycerol kinase                                      | GK      | 594  | 678  | 429  | 612  | 1.1             | 0.7  | 1.0  | 1.4  |
| T66002021.1                                                 | Glycerol-3-phosphate dehydrogenase                   | G3PDH-1 | 79   | 83   | 74   | 80   | 1.0             | 0.9  | 1.0  | 1.1  |
| T66004387.1                                                 | Glycerol-3-phosphate dehydrogenase                   | G3PDH-2 | 6    | 14   | 6    | 5    | 2.4             | 1.0  | 0.9  | 0.9  |
| T66006468.1                                                 | Glycerol-3-phosphate dehydrogenase                   | G3PDH-3 | 199  | 204  | 227  | 461  | 1.0             | 1.1  | 2.3  | 2.0  |
| <b>Glycolysis and gluconeogenesis</b>                       |                                                      |         |      |      |      |      |                 |      |      |      |
| T66001432.1                                                 | Phosphoglucomutase                                   | PGM     | 374  | 372  | 293  | 305  | 1.0             | 0.8  | 0.8  | 1.0  |
| T66010908.1                                                 | Phosphoglucomutase                                   | PGM     | 153  | 192  | 217  | 193  | 1.3             | 1.4  | 1.3  | 0.9  |
| T66007276.1                                                 | Hexokinase                                           | HK      | 51   | 60   | 31   | 38   | 1.2             | 0.6  | 0.7  | 1.2  |
| T66008242.1                                                 | 6-phosphofructokinase                                | PFK     | 27   | 38   | 37   | 21   | 1.4             | 1.4  | 0.8  | 0.6  |
| T66007108.2                                                 | 6-phosphofructo-2-kinase/fructose-2,6-bisphosphatase | PFKFB   | 22   | 25   | 25   | 31   | 1.1             | 1.1  | 1.4  | 1.2  |
| T66004362.1                                                 | Aldolase                                             | ALDO    | 1009 | 1359 | 1622 | 1244 | 1.3             | 1.6  | 1.2  | 0.8  |
| T66009200.1                                                 | Triosephosphate isomerase                            | TPI     | 495  | 445  | 547  | 538  | 0.9             | 1.1  | 1.1  | 1.0  |
| T66010864.1                                                 | Triosephosphate isomerase                            | TPI     | 619  | 876  | 404  | 330  | 1.4             | 0.7  | 0.5  | 0.8  |
| T66010775.1                                                 | Glyceraldehyde-3-phosphate dehydrogenase             | GAPDH-1 | 81   | 47   | 67   | 45   | 0.6             | 0.8  | 0.6  | 0.7  |
| T66011026.1                                                 | Glyceraldehyde-3-phosphate dehydrogenase             | GAPDH-2 | 1978 | 1946 | 2217 | 2489 | 1.0             | 1.1  | 1.3  | 1.1  |
| T66011142.1                                                 | Glyceraldehyde-3-phosphate dehydrogenase             | GAPDH-3 | 908  | 1233 | 597  | 504  | 1.4             | 0.7  | 0.6  | 0.8  |
| T66006855.2                                                 | Phosphoglycerate kinase                              | PGK-1   | 209  | 293  | 253  | 170  | 1.4             | 1.2  | 0.8  | 0.7  |
| T66010974.1                                                 | Phosphoglycerate kinase                              | PGK-2   | 383  | 329  | 381  | 307  | 0.9             | 1.0  | 0.8  | 0.8  |
| T66001704.1                                                 | Phosphoglycerate mutase                              | PGAM-1  | 107  | 156  | 185  | 148  | 1.5             | 1.7  | 1.4  | 0.8  |
| T66009556.1                                                 | Phosphoglycerate mutase                              | PGAM-2  | 22   | 26   | 22   | 32   | 1.2             | 1.0  | 1.5  | 1.4  |
| T66010905.1                                                 | Phosphoglycerate mutase                              | PGAM-3  | 580  | 531  | 657  | 484  | 0.9             | 1.1  | 0.8  | 0.7  |
| T66006628.1                                                 | Enolase                                              | ENO     | 1208 | 834  | 1102 | 860  | 0.7             | 0.9  | 0.7  | 0.8  |
| T66000705.1                                                 | Pyruvate kinase                                      | PYK-1   | 271  | 590  | 415  | 283  | 2.2             | 1.5  | 1.0  | 0.7  |
| T66003792.1                                                 | Pyruvate kinase                                      | PYK-2   | 45   | 46   | 69   | 50   | 1.0             | 1.5  | 1.1  | 0.7  |
| T66006173.1                                                 | Pyruvate dehydrogenase E1 subunit alpha              | PDHA    | 1012 | 596  | 513  | 495  | 0.6             | 0.5  | 0.5  | 1.0  |
| T66011336.1                                                 | Pyruvate dehydrogenase E1 subunit beta               | PDHB    | 902  | 697  | 575  | 547  | 0.8             | 0.6  | 0.6  | 1.0  |
| T66002987.2                                                 | Pyruvate dehydrogenase E2 subunit                    | PDHC    | 458  | 245  | 249  | 273  | 0.5             | 0.5  | 0.6  | 1.1  |
| T66002528.1                                                 | Pyruvate dehydrogenase x component                   | PDHX    | 460  | 303  | 290  | 310  | 0.7             | 0.6  | 0.7  | 1.1  |
| T66008367.1                                                 | Dihydrolipoyl dehydrogenase                          | DLDH    | 905  | 568  | 698  | 970  | 0.6             | 0.8  | 1.1  | 1.4  |
| <b>TCA</b>                                                  |                                                      |         |      |      |      |      |                 |      |      |      |
| T66011598.1                                                 | Citrate synthase                                     | CS      | 485  | 382  | 494  | 371  | 0.8             | 1.0  | 0.8  | 0.8  |
| T66007190.4                                                 | Aconitase                                            | ACO     | 572  | 609  | 988  | 638  | 1.1             | 1.7  | 1.1  | 0.6  |
| T66002600.1                                                 | Isocitrate dehydrogenase                             | IDH-1   | 278  | 188  | 178  | 187  | 0.7             | 0.6  | 0.7  | 1.1  |
| T66004470.1                                                 | Isocitrate dehydrogenase                             | IDH-2   | 369  | 207  | 337  | 315  | 0.6             | 0.9  | 0.9  | 0.9  |
| T66006170.1                                                 | Alpha-ketoglutarate dehydrogenase                    | AKGDH-1 | 10   | 9    | 14   | 17   | 0.9             | 1.4  | 1.7  | 1.3  |
| T66010195.3                                                 | Alpha-ketoglutarate dehydrogenase                    | AKGDH-2 | 312  | 197  | 278  | 210  | 0.6             | 0.9  | 0.7  | 0.8  |
| T66010794.1                                                 | Alpha-ketoglutarate dehydrogenase                    | AKGDH-3 | 262  | 135  | 181  | 200  | 0.5             | 0.7  | 0.8  | 1.1  |
| T66006817.1                                                 | Succinate - CoA ligase subunit alpha                 | SCLA    | 390  | 210  | 324  | 255  | 0.5             | 0.8  | 0.7  | 0.8  |
| T66010760.1                                                 | Succinate - CoA ligase subunit beta                  | SCLB    | 616  | 450  | 710  | 375  | 0.7             | 1.2  | 0.6  | 0.5  |
| T66002966.1                                                 | Succinate dehydrogenase                              | SDH-1   | 458  | 398  | 426  | 449  | 0.9             | 0.9  | 1.0  | 1.1  |
| T66005536.1                                                 | Succinate dehydrogenase                              | SDH-2   | 912  | 761  | 865  | 704  | 0.8             | 0.9  | 0.8  | 0.8  |
| T66009371.1                                                 | Succinate dehydrogenase                              | SDH-3   | 671  | 553  | 670  | 569  | 0.8             | 1.0  | 0.8  | 0.8  |
| T66009538.1                                                 | Succinate dehydrogenase                              | SDH-4   | 444  | 345  | 364  | 401  | 0.8             | 0.8  | 0.9  | 1.1  |
| T66000653.1                                                 | Fumarase                                             | FUM-1   | 140  | 75   | 524  | 381  | 0.5             | 3.7  | 2.7  | 0.7  |
| T66005350.1                                                 | Fumarase                                             | FUM-2   | 165  | 117  | 86   | 99   | 0.7             | 0.5  | 0.6  | 1.2  |
| T66000362.1                                                 | Malate dehydrogenase                                 | MDH-1   | 2105 | 1174 | 1492 | 1609 | 0.6             | 0.7  | 0.8  | 1.1  |
| T66007876.1                                                 | Malate dehydrogenase                                 | MDH-2   | 729  | 538  | 765  | 620  | 0.7             | 1.0  | 0.9  | 0.8  |
| <b>PPP</b>                                                  |                                                      |         |      |      |      |      |                 |      |      |      |
| T66005578.1                                                 | Glucose-6-phosphate dehydrogenase                    | G6PDH   | 95   | 106  | 174  | 120  | 1.1             | 1.8  | 1.3  | 0.7  |
| T66001999.1                                                 | 6-phosphogluconolactonase                            | PGL     | 248  | 188  | 425  | 304  | 0.8             | 1.7  | 1.2  | 0.7  |
| T66000832.1                                                 | 6-phosphogluconate dehydrogenase                     | 6PGD    | 429  | 350  | 516  | 478  | 0.8             | 1.2  | 1.1  | 0.9  |
| T66008357.1                                                 | Ribulose-5-phosphate 3-epimerase                     | RPE     | 183  | 94   | 156  | 143  | 0.5             | 0.9  | 0.8  | 0.9  |
| T66011653.1                                                 | Ribose-5-phosphate isomerase                         | RPI     | 80   | 21   | 56   | 45   | 0.3             | 0.7  | 0.6  | 0.8  |
| T66011482.1                                                 | Transketolase                                        | TKT     | 354  | 193  | 272  | 200  | 0.5             | 0.8  | 0.6  | 0.7  |
| T66011516.1                                                 | Transaldolase                                        | TAL     | 1388 | 940  | 1802 | 1912 | 0.7             | 1.3  | 1.4  | 1.1  |
| <b>Associated reactions, cycles and shunts</b>              |                                                      |         |      |      |      |      |                 |      |      |      |
| T66007131.1                                                 | Phosphoenolpyruvate carboxylase                      | PEPC    | 122  | 163  | 215  | 68   | 1.3             | 1.8  | 0.6  | 0.3  |
| T66000322.1                                                 | Fumarate reductase                                   | FRD-1   | 21   | 18   | 34   | 31   | 0.9             | 1.6  | 1.5  | 0.9  |
| T66006276.1                                                 | Fumarate reductase                                   | FRD-2   | 308  | 490  | 347  | 238  | 1.6             | 1.1  | 0.8  | 0.7  |
| T66007409.1                                                 | Fumarate reductase                                   | FRD-3   | 39   | 53   | 23   | 32   | 1.4             | 0.6  | 0.8  | 1.4  |
| T66001125.1                                                 | Pyruvate carboxylase                                 | PYC     | 20   | 16   | 21   | 22   | 0.8             | 1.0  | 1.1  | 1.1  |
| T66006070.1                                                 | Malic enzyme                                         | ME-1    | 64   | 59   | 60   | 62   | 0.9             | 0.9  | 1.0  | 1.0  |
| T66007895.1                                                 | Malic enzyme                                         | ME-2    | 353  | 136  | 181  | 159  | 0.4             | 0.5  | 0.5  | 0.9  |
| T66002129.1                                                 | Isocitrate lyase                                     | ICL     | 398  | 547  | 767  | 329  | 1.4             | 1.9  | 0.8  | 0.4  |
| T66003898.1                                                 | Malate synthase                                      | MS      | 188  | 271  | 558  | 229  | 1.4             | 3.0  | 1.2  | 0.4  |
| T66011704                                                   | Glutamine synthetase                                 | GS      | 2    | 27   | 1    | 4    | 14.6            | 0.5  | 1.9  | 4.1  |
| T66001169.1                                                 | Glutamate dehydrogenase                              | GDH-1   | 256  | 216  | 336  | 200  | 0.8             | 1.3  | 0.8  | 0.6  |
| T66003915.1                                                 | Glutamate dehydrogenase                              | GDH-2   | 47   | 42   | 55   | 57   | 0.9             | 1.2  | 1.2  | 1.0  |
| T66009186.1                                                 | Glutamate dehydrogenase                              | GDH-3   | 97   | 85   | 94   | 99   | 0.9             | 1.0  | 1.0  | 1.0  |
| T66004665.1                                                 | Glutamate decarboxylase                              | GAD     | 58   | 53   | 529  | 381  | 0.9             | 9.1  | 6.5  | 0.7  |
| T66003533.1                                                 | γ-aminobutyrate aminotransferase                     | GABAT   | 133  | 93   | 137  | 280  | 0.7             | 1.0  | 2.1  | 2.1  |
| T66001194.1                                                 | Succinate semialdehyde dehydrogenase                 | SSDH-1  | 120  | 45   | 60   | 106  | 0.4             | 0.5  | 0.9  | 1.8  |
| T66005295.1                                                 | Succinate semialdehyde dehydrogenase                 | SSDH-2  | 4.2  | 8.2  | 259  | 110  | 1.9             | 61.7 | 26.2 | 0.4  |
| T66001332.1                                                 | Aspartate aminotransferase                           | AST     | 699  | 328  | 419  | 421  | 0.5             | 0.6  | 0.6  | 1.0  |
| T66002557.1                                                 | Aspartate aminotransferase                           | AST     | 884  | 611  | 608  | 571  | 0.7             | 0.7  | 0.6  | 0.9  |
| T66008840.1                                                 | AMP-deaminase                                        | AMPD    | 34   | 54   | 95   | 56   | 1.6             | 2.8  | 1.7  | 0.6  |

| ID                                      | Name                                                          | Abbr    | E   | RPKM |      |     | Fold difference |      |      |      |
|-----------------------------------------|---------------------------------------------------------------|---------|-----|------|------|-----|-----------------|------|------|------|
|                                         |                                                               |         |     | N1   | N2   | O   | N1/E            | N2/E | O/E  | O/N2 |
| T66005762.1                             | Acetyl-CoA synthetase                                         | ACS     | 45  | 35   | 29   | 17  | 0.8             | 0.6  | 0.4  | 0.6  |
| T66008640.1                             | Succinyl-CoA D-citramalate CoA-transferase                    | SCCT    | 52  | 14   | 36   | 18  | 0.3             | 0.7  | 0.3  | 0.5  |
| <b>Transport in/out of mitochondria</b> |                                                               |         |     |      |      |     |                 |      |      |      |
| T66000025.1                             | Citrate transport protein                                     | CTP-1   | 349 | 398  | 408  | 258 | 1.1             | 1.2  | 0.7  | 0.6  |
| T66000466.1                             | Citrate transport protein                                     | CTP-2   | 41  | 87   | 304  | 61  | 2.1             | 7.4  | 1.5  | 0.2  |
| T66007495.1                             | Ornithine transporter, mitochondrial                          | ORNT-1  | 73  | 225  | 1252 | 70  | 3.1             | 17.2 | 1.0  | 0.1  |
| T66007710.1                             | Ornithine transporter, mitochondrial                          | ORNT-2  | 14  | 41   | 114  | 10  | 3.0             | 8.4  | 0.8  | 0.1  |
| T66011468.1                             | Citrate/ketoglutarate carrier protein                         | CCP     | 50  | 39   | 136  | 47  | 0.8             | 2.7  | 1.0  | 0.3  |
| T66004483.1                             | $\alpha$ -ketoglutarate/malate carrier protein, mitochondrial | KGMT-1  | 20  | 25   | 4    | 8   | 1.2             | 0.2  | 0.4  | 2.0  |
| T66004756.1                             | $\alpha$ -ketoglutarate/malate carrier protein, mitochondrial | KGMT-2  | 142 | 57   | 75   | 96  | 0.4             | 0.5  | 0.7  | 1.3  |
| T66004735.1                             | Dicarboxylate/tricarboxylate transporter, mitochondrial       | DCT     | 414 | 676  | 482  | 442 | 1.6             | 1.2  | 1.1  | 0.9  |
| T66005256.3                             | Carnitine O-acetyltransferase                                 | CAC-1   | 828 | 1000 | 288  | 505 | 1.2             | 0.3  | 0.6  | 1.8  |
| T66006791.1                             | Carnitine O-acetyltransferase                                 | CAC-2   | 72  | 79   | 218  | 66  | 1.1             | 3.0  | 0.9  | 0.3  |
| T66009279.1                             | Mitochondrial carnitine/acylcarnitine carrier protein         | CACT    | 284 | 204  | 281  | 168 | 0.7             | 1.0  | 0.6  | 0.6  |
| <b>Fatty acid synthesis</b>             |                                                               |         |     |      |      |     |                 |      |      |      |
| T66005706.1                             | Acetyl-CoA carboxylase                                        | ACC     | 196 | 452  | 231  | 189 | 2.3             | 1.2  | 1.0  | 0.8  |
| T66010470.1                             | Malonyl-CoA acyltransferase                                   | MCAT-1  | 55  | 36   | 47   | 58  | 0.7             | 0.9  | 1.1  | 1.2  |
| T66001099.1                             | Malonyl-CoA acyltransferase, putative                         | MCAT-2  | 6   | 14   | 20   | 16  | 2.1             | 3.2  | 2.4  | 0.8  |
| T66003188.1                             | Malonyl-CoA acyltransferase, putative                         | MCAT-3  | 15  | 14   | 8    | 16  | 0.9             | 0.6  | 1.1  | 1.9  |
| T66001699.1                             | Acyl carrier protein                                          | ACP     | 176 | 91   | 72   | 100 | 0.5             | 0.4  | 0.6  | 1.4  |
| T66004311.1                             | Fatty acid synthase 1                                         | FAS     | 54  | 163  | 103  | 50  | 3.0             | 1.9  | 0.9  | 0.5  |
| T66011701                               | Polyunsaturated fatty acid synthase subunit A                 | PFAA    | 312 | 461  | 221  | 245 | 1.5             | 0.7  | 0.8  | 1.1  |
| T66005413.1                             | Polyunsaturated fatty acid synthase subunit B                 | PFAB    | 173 | 233  | 118  | 158 | 1.3             | 0.7  | 0.9  | 1.3  |
| T66011702                               | Polyunsaturated fatty acid synthase subunit C                 | PFAC    | 330 | 563  | 197  | 258 | 1.7             | 0.6  | 0.8  | 1.3  |
| T66011703                               | Phosphopantetheinyl transferase                               | PFAD    | 58  | 50   | 43   | 68  | 0.9             | 0.8  | 1.2  | 1.6  |
| T66002724.1                             | $\Delta 6$ fatty acid desaturase                              | d6D     | 4   | 12   | 12   | 2   | 2.9             | 2.8  | 0.5  | 0.2  |
| T66002957.1                             | $\Delta 12$ fatty acid desaturase                             | d12D    | 85  | 417  | 1802 | 377 | 4.9             | 21.2 | 4.4  | 0.2  |
| T66006792.1                             | $\Delta 5$ fatty acid desaturase                              | d5D     | 30  | 41   | 19   | 34  | 1.4             | 0.6  | 1.1  | 1.8  |
| T66003476.1                             | $\Delta 5$ fatty acid desaturase                              | d5D     | 12  | 13   | 17   | 12  | 1.0             | 1.4  | 1.0  | 0.7  |
| T66010139.1                             | $\Delta 4$ fatty acid desaturase                              | d4D     | 45  | 44   | 21   | 19  | 1.0             | 0.5  | 0.4  | 0.9  |
| T66000527.1                             | $\Delta 9$ fatty acid desaturase                              | d9D     | 42  | 25   | 47   | 56  | 0.6             | 1.1  | 1.4  | 1.2  |
| T66006246.1                             | $\Delta 8$ fatty acid desaturase                              | d8D     | 77  | 72   | 48   | 54  | 0.9             | 0.6  | 0.7  | 1.1  |
| T66003689.1                             | C18- $\Delta 6$ /C18- $\Delta 9$ /C20- $\Delta 5$ elongase    | ELO-1   | 207 | 144  | 247  | 201 | 0.7             | 1.2  | 1.0  | 0.8  |
| T66005597.1                             | Fatty acyl-CoA elongase                                       | ELO-2   | 290 | 253  | 185  | 145 | 0.9             | 0.6  | 0.5  | 0.8  |
| T66007915.1                             | Fatty acyl-CoA elongase                                       | ELO-3   | 26  | 23   | 35   | 62  | 0.9             | 1.3  | 2.4  | 1.8  |
| T66007922.1                             | Fatty acyl-CoA elongase                                       | ELO-4   | 383 | 390  | 324  | 171 | 1.0             | 0.8  | 0.4  | 0.5  |
| T66009340.1                             | C16- $\Delta 9$ elongase                                      | ELO-5   | 27  | 28   | 6    | 7   | 1.0             | 0.2  | 0.2  | 1.2  |
| T66006290.1                             | Trans-acting enoyl reductase                                  | ER-1    | 432 | 99   | 146  | 284 | 0.2             | 0.3  | 0.7  | 2.0  |
| T66006359.1                             | Trans-acting enoyl reductase                                  | ER-2    | 67  | 49   | 38   | 77  | 0.7             | 0.6  | 1.2  | 2.0  |
| T66007784.1                             | Trans-2-enoyl-CoA reductase                                   | ER-3    | 6   | 8    | 7    | 11  | 1.3             | 1.0  | 1.7  | 1.7  |
| T66009285.1                             | Trans-2-enoyl-CoA reductase                                   | ER-4    | 18  | 55   | 94   | 142 | 3.0             | 5.1  | 7.7  | 1.5  |
| T66011009.1                             | Enoyl-[acyl-carrier-protein] reductase                        | FabI    | 30  | 38   | 24   | 28  | 1.3             | 0.8  | 0.9  | 1.1  |
| T66001907.1                             | Acyl-CoA thioesterase                                         | ACOT-1  | 134 | 128  | 172  | 167 | 1.0             | 1.3  | 1.2  | 1.0  |
| T66002260.1                             | Acyl-CoA thioesterase                                         | ACOT-2  | 47  | 45   | 49   | 40  | 1.0             | 1.0  | 0.8  | 0.8  |
| T66002759.1                             | Acyl-CoA thioesterase                                         | ACOT-3  | 29  | 47   | 84   | 42  | 1.6             | 2.9  | 1.5  | 0.5  |
| T66008091.1                             | Acyl-CoA thioesterase                                         | ACOT-4  | 32  | 36   | 67   | 32  | 1.1             | 2.1  | 1.0  | 0.5  |
| T66004579.1                             | Acyl-CoA fatty acid synthetase, short-chain                   | ACSS-1  | 6   | 9    | 27   | 14  | 1.4             | 4.2  | 2.1  | 0.5  |
| T66004840.1                             | Acyl-CoA fatty acid synthetase, short-chain                   | ACSS-2  | 15  | 36   | 26   | 10  | 2.4             | 1.7  | 0.6  | 0.4  |
| T66000024.1                             | Acyl-CoA fatty acid synthetase, long-chain                    | ACSL-1  | 37  | 24   | 16   | 29  | 0.7             | 0.4  | 0.8  | 1.8  |
| T66001622.1                             | Acyl-CoA fatty acid synthetase, long-chain                    | ACSL-2  | 2   | 2    | 112  | 72  | 0.7             | 51.8 | 33.4 | 0.6  |
| T66002738.1                             | Acyl-CoA fatty acid synthetase, long-chain                    | ACSL-3  | 77  | 75   | 19   | 41  | 1.0             | 0.2  | 0.5  | 2.2  |
| T66002739.1                             | Acyl-CoA fatty acid synthetase, long-chain                    | ACSL-4  | 5   | 14   | 6    | 8   | 2.7             | 1.1  | 1.6  | 1.4  |
| T66003686.1                             | Acyl-CoA fatty acid synthetase, long-chain                    | ACSL-5  | 38  | 53   | 16   | 11  | 1.4             | 0.4  | 0.3  | 0.7  |
| T66005211.1                             | Acyl-CoA fatty acid synthetase, long-chain                    | ACSL-6  | 47  | 51   | 30   | 63  | 1.1             | 0.6  | 1.3  | 2.1  |
| T66006986.1                             | Acyl-CoA fatty acid synthetase, long-chain                    | ACSL-7  | 91  | 71   | 164  | 76  | 0.8             | 1.8  | 0.8  | 0.5  |
| T66007272.1                             | Acyl-CoA fatty acid synthetase, long-chain                    | ACSL-8  | 135 | 91   | 80   | 166 | 0.7             | 0.6  | 1.2  | 2.1  |
| T66007597.1                             | Acyl-CoA fatty acid synthetase, long-chain                    | ACSL-9  | 217 | 332  | 82   | 152 | 1.5             | 0.4  | 0.7  | 1.9  |
| T66009075.1                             | Acyl-CoA fatty acid synthetase, long-chain                    | ACSL-10 | 98  | 112  | 30   | 34  | 1.1             | 0.3  | 0.3  | 1.1  |
| T66009076.1                             | Acyl-CoA fatty acid synthetase, long-chain                    | ACSL-11 | 87  | 131  | 121  | 62  | 1.5             | 1.4  | 0.7  | 0.5  |
| T66009117.1                             | Acyl-CoA fatty acid synthetase, long-chain                    | ACSL-12 | 22  | 23   | 27   | 22  | 1.0             | 1.2  | 1.0  | 0.8  |
| T66010236.1                             | Acyl-CoA fatty acid synthetase, long-chain                    | ACSL-13 | 2   | 25   | 8    | 1   | 14.2            | 4.9  | 0.5  | 0.1  |
| T66010645.1                             | Acyl-CoA fatty acid synthetase, long-chain                    | ACSL-14 | 27  | 21   | 17   | 15  | 0.8             | 0.6  | 0.6  | 0.9  |
| T66002859.1                             | Long-chain fatty acid transport protein (with ACSL)           | FATP-1  | 90  | 122  | 99   | 28  | 1.4             | 1.1  | 0.3  | 0.3  |
| T66004341.1                             | Long-chain fatty acid transport protein (with ACSL)           | FATP-2  | 15  | 11   | 22   | 10  | 0.7             | 1.5  | 0.7  | 0.5  |
| <b>TAG-synthesis</b>                    |                                                               |         |     |      |      |     |                 |      |      |      |
| T66005184.1                             | Glycerol-3 phosphate acyl transferase                         | GPAT-1  | 26  | 36   | 42   | 32  | 1.4             | 1.6  | 1.2  | 0.8  |
| T66005946.1                             | Glycerol-3 phosphate acyl transferase                         | GPAT-2  | 2   | 14   | 3    | 0   | 5.9             | 1.2  | 0.2  | 0.1  |
| T66007924.1                             | Glycerol-3 phosphate acyl transferase                         | GPAT-3  | 43  | 68   | 55   | 48  | 1.6             | 1.3  | 1.1  | 0.9  |
| T66008858.1                             | Glycerol-3 phosphate acyl transferase                         | GPAT-4  | 99  | 53   | 45   | 38  | 0.5             | 0.5  | 0.4  | 0.8  |
| T66004032.1                             | Acylglycerol-3-phosphate acyltransferase                      | AGPAT-1 | 12  | 24   | 4    | 8   | 2.0             | 0.4  | 0.7  | 1.9  |
| T66005810.1                             | Acylglycerol-3-phosphate acyltransferase                      | AGPAT-2 | 42  | 36   | 26   | 49  | 0.9             | 0.6  | 1.2  | 1.9  |
| T66007568.1                             | Acylglycerol-3-phosphate acyltransferase                      | AGPAT-3 | 1   | 10   | 4    | 2   | 6.9             | 3.0  | 1.1  | 0.4  |
| T66010013.1                             | Acylglycerol-3-phosphate acyltransferase                      | AGPAT-4 | 3   | 23   | 5    | 1   | 6.9             | 1.6  | 0.3  | 0.2  |
| T66010664.1                             | Acylglycerol-3-phosphate acyltransferase                      | AGPAT-5 | 27  | 19   | 5    | 15  | 0.7             | 0.2  | 0.5  | 3.2  |
| T66002159.2                             | Phosphatidic acid phosphatase                                 | PAP-1   | 57  | 66   | 61   | 60  | 1.1             | 1.1  | 1.1  | 1.0  |
| T66006416.1                             | Phosphatidic acid phosphatase                                 | PAP-2   | 55  | 87   | 106  | 45  | 1.6             | 1.9  | 0.8  | 0.4  |
| T66006417.1                             | Phosphatidic acid phosphatase                                 | PAP-3   | 74  | 81   | 66   | 85  | 1.1             | 0.9  | 1.2  | 1.3  |
| T66002778.1                             | Diacylglycerol acyltransferase                                | DGAT-1  | 14  | 24   | 93   | 34  | 1.7             | 6.6  | 2.4  | 0.4  |
| T66003952.1                             | Diacylglycerol acyltransferase                                | DGAT-2  | 28  | 21   | 48   | 21  | 0.8             | 1.7  | 0.8  | 0.4  |
| T66007335.1                             | Diacylglycerol acyltransferase                                | DGAT-3  | 111 | 86   | 86   | 87  | 0.8             | 0.8  | 0.8  | 1.0  |
| T66011424.1                             | Diacylglycerol acyltransferase                                | DGAT-4  | 33  | 39   | 28   | 17  | 1.2             | 0.8  | 0.5  | 0.6  |
| T66009334.1                             | Lipid droplet protein                                         | TLDP    | 365 | 635  | 1698 | 622 | 1.7             | 4.7  | 1.7  | 0.4  |

| ID                  | Name                                                                        | Abbr  | E   | RPKM |     |     | Fold difference |      |     |      |
|---------------------|-----------------------------------------------------------------------------|-------|-----|------|-----|-----|-----------------|------|-----|------|
|                     |                                                                             |       |     | N1   | N2  | O   | N1/E            | N2/E | O/E | O/N2 |
| <b>PL-synthesis</b> |                                                                             |       |     |      |     |     |                 |      |     |      |
| T66010441.1         | Ethanolamine kinase                                                         | EK    | 23  | 20   | 37  | 45  | 0.9             | 1.6  | 1.9 | 1.2  |
| T66000212.1         | Ethanolamine kinase                                                         | EK    | 145 | 129  | 164 | 92  | 0.9             | 1.1  | 0.6 | 0.6  |
| T66000551.1         | 1-phosphatidylinositol-4-phosphate 5-kinase, family protein                 |       | 14  | 17   | 17  | 29  | 1.2             | 1.2  | 2.0 | 1.7  |
| T66003275.1         | Phosphatidylinositol 3 and 4-kinase-like protein                            |       | 6   | 34   | 14  | 2   | 6.1             | 2.4  | 0.4 | 0.2  |
| T66001706.1         | Diacylglycerol kinase                                                       | DGK   | 45  | 49   | 60  | 56  | 1.1             | 1.3  | 1.2 | 0.9  |
| T66002626.1         | Diacylglycerol kinase                                                       | DGK   | 2   | 13   | 5   | 1   | 8.5             | 3.6  | 0.5 | 0.1  |
| T66007854.1         | Diacylglycerol kinase                                                       | DGK   | 41  | 38   | 30  | 35  | 0.9             | 0.7  | 0.8 | 1.2  |
| T66000277.1         | Lysophosphatidylcholine acyl transferase                                    | LPCAT | 26  | 30   | 36  | 41  | 1.2             | 1.4  | 1.6 | 1.1  |
| T66005465.1         | Lysophosphatidylcholine acyl transferase                                    | LPCAT | 76  | 161  | 52  | 77  | 2.1             | 0.7  | 1.0 | 1.5  |
| T66005769.1         | Lysophosphatidylcholine acyl transferase                                    | LPCAT | 29  | 35   | 29  | 28  | 1.2             | 1.0  | 1.0 | 1.0  |
| T66009152.1         | Lysophosphatidylcholine acyl transferase                                    | LPCAT | 38  | 42   | 62  | 57  | 1.1             | 1.6  | 1.5 | 0.9  |
| T66010977.1         | Lysophosphatidylcholine acyl transferase                                    | LPCAT | 32  | 36   | 19  | 23  | 1.1             | 0.6  | 0.7 | 1.2  |
| T66005776.1         | Lysocardiolipin acyltransferase                                             | LCLAT | 73  | 114  | 204 | 130 | 1.6             | 2.8  | 1.8 | 0.6  |
| T66003672.1         | Phosphatidate cytidylyltransferase                                          | CDS   | 79  | 112  | 92  | 89  | 1.4             | 1.2  | 1.1 | 1.0  |
| T66008267.1         | Phosphatidate cytidylyltransferase                                          | CDS   | 42  | 44   | 33  | 49  | 1.1             | 0.8  | 1.2 | 1.5  |
| T66010654.1         | Choline/ethanolaminephosphotransferase                                      | CEPT  | 109 | 78   | 60  | 65  | 0.7             | 0.6  | 0.6 | 1.1  |
| T66002981.1         | Choline/ethanolaminephosphotransferase                                      | CEPT  | 90  | 49   | 36  | 68  | 0.5             | 0.4  | 0.8 | 1.9  |
| T66004322.1         | Phosphatidylethanolamine N-methyltransferase                                | PEMT  | 101 | 57   | 47  | 50  | 0.6             | 0.5  | 0.5 | 1.1  |
| T66005702.1         | Phosphatidylethanolamine N-methyltransferase                                | PEMT  | 34  | 39   | 45  | 34  | 1.1             | 1.3  | 1.0 | 0.8  |
| T66005555.1         | Ethanolamine-phosphate cytidylyltransferase                                 | PECT  | 138 | 109  | 119 | 130 | 0.8             | 0.9  | 0.9 | 1.1  |
| T66005046.1         | Phosphatidylserine decarboxylase                                            | PSD   | 61  | 56   | 33  | 40  | 0.9             | 0.5  | 0.6 | 1.2  |
| T66009397.1         | Phosphatidylserine decarboxylase                                            | PSD   | 178 | 74   | 99  | 137 | 0.4             | 0.6  | 0.8 | 1.4  |
| T66010026.1         | Phosphatidylserine decarboxylase                                            | PSD   | 42  | 44   | 43  | 54  | 1.0             | 1.0  | 1.3 | 1.3  |
| T66008195.1         | Phosphatidylserine decarboxylase                                            | PSS   | 16  | 20   | 6   | 9   | 1.3             | 0.4  | 0.5 | 1.5  |
| T66006631.1         | Cardiolipin synthase                                                        | CRLS  | 14  | 13   | 8   | 25  | 1.0             | 0.6  | 1.8 | 3.1  |
| T66009976.1         | Cardiolipin synthase                                                        | CRLS  | 68  | 70   | 72  | 76  | 1.0             | 1.1  | 1.1 | 1.0  |
| T66004308.1         | Cyclopropane-fatty-acyl-phospholipid synthase                               |       | 29  | 30   | 70  | 114 | 1.1             | 2.4  | 4.0 | 1.6  |
| <b>β-oxidation</b>  |                                                                             |       |     |      |     |     |                 |      |     |      |
| T66005991.15        | Hydroxyacyl-CoA dehydrogenase trifunctional                                 | HADHA | 104 | 101  | 92  | 80  | 1.0             | 0.9  | 0.8 | 0.9  |
| T66003371.1         | Hydroxyacyl-CoA dehydrogenase trifunctional                                 | HADHB | 305 | 236  | 265 | 209 | 0.8             | 0.9  | 0.7 | 0.8  |
| T66000450.1         | Acyl-CoA dehydrogenase family protein                                       | ACAD  | 458 | 382  | 448 | 361 | 0.8             | 1.0  | 0.8 | 0.8  |
| T66004594.1         | Acyl-CoA dehydrogenase family protein                                       | ACAD  | 21  | 31   | 23  | 15  | 1.5             | 1.1  | 0.7 | 0.6  |
| T66005144.9         | Acyl-CoA dehydrogenase family protein                                       | ACAD  | 62  | 49   | 15  | 45  | 0.8             | 0.2  | 0.7 | 2.9  |
| T66007132.1         | Acyl-CoA dehydrogenase family protein                                       | ACAD  | 68  | 64   | 56  | 61  | 0.9             | 0.8  | 0.9 | 1.1  |
| T66008866.1         | Acyl-CoA dehydrogenase family protein                                       | ACAD  | 33  | 30   | 32  | 27  | 0.9             | 1.0  | 0.8 | 0.9  |
| T66009628.1         | Acyl-CoA dehydrogenase family protein                                       | ACAD  | 50  | 72   | 47  | 20  | 1.4             | 0.9  | 0.4 | 0.4  |
| T66010787.1         | Acyl-CoA dehydrogenase family protein                                       | ACAD  | 117 | 92   | 85  | 192 | 0.8             | 0.7  | 1.7 | 2.3  |
| T66010938.1         | Acyl-CoA dehydrogenase family protein                                       | ACAD  | 89  | 112  | 190 | 174 | 1.3             | 2.1  | 2.0 | 0.9  |
| T66005078.1         | Short-chain-enoyl-CoA hydratase                                             | ECHS  | 5   | 40   | 6   | 3   | 8.1             | 1.2  | 0.6 | 0.5  |
| T66006784.1         | Short-chain-enoyl-CoA hydratase                                             | ECHS  | 45  | 15   | 24  | 15  | 0.3             | 0.5  | 0.3 | 0.6  |
| T66006999.1         | Short-chain-enoyl-CoA hydratase                                             | ECHS  | 123 | 72   | 101 | 100 | 0.6             | 0.8  | 0.8 | 1.0  |
| T66003615.1         | Enoyl-CoA hydratase domain-containing protein                               | ECH   | 27  | 13   | 11  | 26  | 0.5             | 0.4  | 0.9 | 2.4  |
| T66003816.1         | 3-hydroxyacyl-CoA dehydrogenase                                             | HCD   | 552 | 265  | 181 | 278 | 0.5             | 0.3  | 0.5 | 1.5  |
| T66003861.1         | 3-hydroxyacyl-CoA dehydrogenase                                             | HCD   | 166 | 108  | 101 | 166 | 0.6             | 0.6  | 1.0 | 1.6  |
| T66001474.1         | 3-ketoacyl-CoA thiolase                                                     | ACAAT | 267 | 238  | 161 | 184 | 0.9             | 0.6  | 0.7 | 1.1  |
| T66001653.1         | 3-ketoacyl-CoA thiolase                                                     | ACAAT | 373 | 244  | 212 | 208 | 0.7             | 0.6  | 0.6 | 1.0  |
| T66004420.1         | 3-ketoacyl-CoA thiolase                                                     | ACAAT | 100 | 147  | 60  | 97  | 1.5             | 0.6  | 1.0 | 1.6  |
| T66007044.1         | Enoyl-CoA delta isomerase                                                   | ECI   | 61  | 45   | 36  | 47  | 0.7             | 0.6  | 0.8 | 1.3  |
| T66007045.1         | Enoyl-CoA delta isomerase                                                   | ECI   | 239 | 149  | 140 | 202 | 0.6             | 0.6  | 0.8 | 1.4  |
| T66008352.1         | Enoyl-CoA delta isomerase                                                   | ECI   | 29  | 40   | 30  | 23  | 1.4             | 1.0  | 0.8 | 0.8  |
| T66011012.1         | Enoyl-CoA delta isomerase                                                   | ECI   | 31  | 27   | 15  | 18  | 0.9             | 0.5  | 0.6 | 1.2  |
| T66004168.1         | Acyl-coenzyme A oxidase                                                     | ACOX  | 8   | 16   | 24  | 21  | 2.0             | 3.0  | 2.6 | 0.9  |
| T66006231.1         | Acyl-coenzyme A oxidase                                                     | ACOX  | 114 | 244  | 408 | 66  | 2.1             | 3.6  | 0.6 | 0.2  |
| T66003165.1         | Bifunctional enzyme (Enoyl-CoA hydratase/<br>3,2-trans-enoyl-CoA isomerase) | ECHP  | 133 | 67   | 75  | 59  | 0.5             | 0.6  | 0.4 | 0.8  |
| T66005296.1         | Bifunctional enzyme (Enoyl-CoA hydratase/<br>3,2-trans-enoyl-CoA isomerase) | ECHP  | 51  | 54   | 43  | 54  | 1.1             | 0.8  | 1.1 | 1.3  |
| <b>Lipases</b>      |                                                                             |       |     |      |     |     |                 |      |     |      |
| T66001646.1         | Triacylglycerol lipase                                                      | TGL   | 30  | 32   | 30  | 21  | 1.0             | 1.0  | 0.7 | 0.7  |
| T66003504.1         | Triacylglycerol lipase                                                      | TGL   | 20  | 24   | 56  | 28  | 1.2             | 2.8  | 1.4 | 0.5  |
| T66005703.1         | Triacylglycerol lipase                                                      | TGL   | 7   | 13   | 13  | 16  | 1.9             | 1.9  | 2.3 | 1.2  |
| T66007930.1         | Triacylglycerol lipase                                                      | TGL   | 10  | 10   | 9   | 14  | 1.0             | 0.9  | 1.5 | 1.6  |
| T66008547.1         | Triacylglycerol lipase                                                      | TGL   | 17  | 29   | 35  | 19  | 1.7             | 2.0  | 1.1 | 0.5  |
| T66001057.1         | Diacylglycerol lipase                                                       | DGL   | 52  | 38   | 29  | 37  | 0.7             | 0.6  | 0.7 | 1.3  |
| T66004528.1         | Diacylglycerol lipase                                                       | DGL   | 24  | 28   | 50  | 48  | 1.2             | 2.1  | 2.0 | 1.0  |
| T66002561.1         | Monoacylglycerol lipase                                                     | MGL   | 19  | 47   | 4   | 8   | 2.5             | 0.2  | 0.4 | 1.8  |
| T66006391.1         | Monoacylglycerol lipase                                                     | MGL   | 76  | 84   | 93  | 65  | 1.1             | 1.2  | 0.9 | 0.7  |
| T66007376.1         | Monoacylglycerol lipase                                                     | MGL   | 145 | 166  | 173 | 105 | 1.1             | 1.2  | 0.7 | 0.6  |
| T66008893.1         | Monoacylglycerol lipase                                                     | MGL   | 24  | 31   | 40  | 33  | 1.3             | 1.7  | 1.3 | 0.8  |
| T66000209.1         | Lipase                                                                      | LIP   | 11  | 15   | 15  | 11  | 1.3             | 1.3  | 1.0 | 0.8  |
| T66001369.1         | Lipase                                                                      | LIP   | 21  | 37   | 72  | 36  | 1.8             | 3.5  | 1.7 | 0.5  |
| T66009381.1         | Lipase                                                                      | LIP   | 8   | 25   | 24  | 11  | 3.1             | 3.0  | 1.3 | 0.4  |
| T66011638.1         | Lipase                                                                      | LIP   | 47  | 51   | 115 | 90  | 1.1             | 2.5  | 1.9 | 0.8  |
| T66002193.1         | Phospholipase                                                               | PL    | 27  | 12   | 32  | 29  | 0.4             | 1.2  | 1.1 | 0.9  |
| T66002282.1         | Phospholipase                                                               | PL    | 6   | 17   | 12  | 3   | 2.9             | 2.0  | 0.5 | 0.3  |
| T66004034.1         | Phospholipase D                                                             | PL    | 101 | 90   | 205 | 155 | 0.9             | 2.0  | 1.5 | 0.8  |
| T66001944.2         | Phospholipase D                                                             | PL    | 9   | 7    | 10  | 11  | 0.8             | 1.2  | 1.3 | 1.1  |

**Table S2.** RNA-seq data set used in the study

| Sample | Code | Clean reads | Clean nucleotides |
|--------|------|-------------|-------------------|
| E-1    | 1-1  | 49,225,200  | 4,430,268,000     |
| E-2    | 1-2  | 49,719,024  | 4,474,712,160     |
| E-3    | 1-3  | 46,168,816  | 4,155,193,440     |
| N1-1   | 2-1  | 48,955,990  | 4,406,039,100     |
| N1-2   | 2-2  | 48,014,542  | 4,321,308,780     |
| N1-3   | 2-3  | 48,844,540  | 4,396,008,600     |
| N2-1   | 3-1  | 48,475,854  | 4,362,826,860     |
| N2-2   | 3-2  | 49,465,088  | 4,451,857,920     |
| N2-3   | 3-3  | 46,881,406  | 4,219,326,540     |
| O-1    | 4-1  | 46,204,326  | 4,158,389,340     |
| O-2    | 4-2  | 47,003,714  | 4,230,334,260     |
| O-3    | 4-3  | 48,368,880  | 4,353,199,200     |

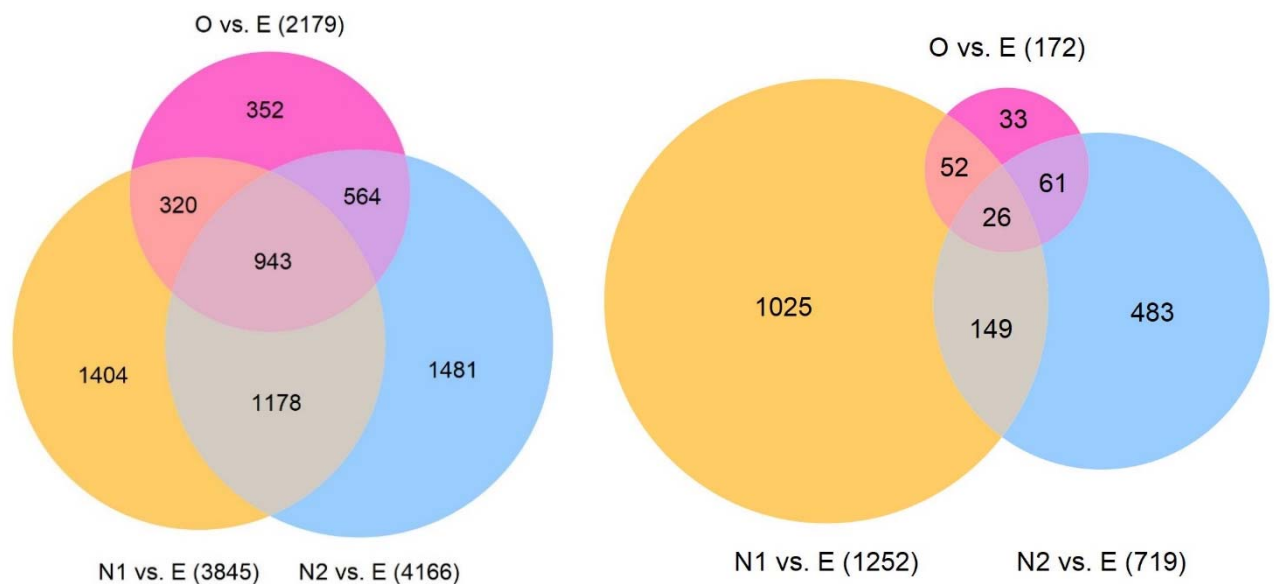

**Figure S1.** Venn diagram with the number of differentially expressed genes in samples N1, N2, and O compared to E (based CPM; counts per million reads mapped). Cut-offs of 2-fold (left) and 8-fold (right) regulation. E: Exponential growth (37 h); N1: Transition (54 h); N2: Lipid accumulation (90 h)

The differential expression was calculated using the "Differential Expression for RNA-Seq 1.0" tool comparing between all group pairs, combining the 3 replicates in groups and with no additional controls set. Venn diagrams were generated from the differential expression files by the "Create Venn Diagram for RNA-Seq 0.1" tool.

## Methods

### Reconstruction of incomplete genes

During the manual curation of the genes of interest some partial genes were identified, including T66005414.1 and T66005224.1 that both encoded partial polyunsaturated fatty acid synthase subunit A (pfaA) genes; T66000202.1, which encoded a partial polyunsaturated fatty acid synthase subunit C (pfaC), and T66002139.1, which encoded a partial glutamine synthetase. Additionally, no phosphopantetheinyl transferase (pfaD) gene had been called during the original annotation process. An annotated draft genome assembly of *Hondaia fermentalgiana* FCC1311 (Genbank: BEYU00000000.1) was recently published and in addition a draft genome assembly with 9 annotated genes related to fatty acid synthesis is available of *Thraustochytrium* sp. ATCC 26185 (Genbank: MUFY01000000; KX651612- KX651618; AB762292- AB762293) (Meesapyodsuk and Qiu, 2016<sup>1</sup>; Zhao et al 2016<sup>2</sup>). The pfaA encoded by KX651612 (showing 100% identity to bp. 200371-203795 of Genbank: KQ758867 and 99.90% identity to bp. 113505-110610 of Genbank:KQ758864), the pfaC encoded by KX651614 (showing 99.97% identity to bp 526485-522565 of Genbank: KQ758850), and the pfaD encoded by KX651615 (showing 99.74% identity to bp 16311163-1631929 of KQ758850) were used as BLAST queries to reconstruct the corresponding genes from *Aurantiochytrium* sp. T66. Due to the very high sequence similarity between the two strains, missing sequences were adapted from the *Thraustochytrium* sp. ATCC 26185 sequences and corrected with RNA-Seq read mapping. Similarly the glutamine synthetase was reconstructed by fusing bp 1518-2104 from Genbank: LNGJ01005523 to bp 8203375 8203835 of KQ758850 based on alignment to the *H. fermentalgiana* FCC1311 (Genbank: BEYU01000128 gene FCC1311\_089412; protein id: GBG32716) sequence (89.06% identical) and to bp 1-1047 of the *Thraustochytrium* sp. ATCC 26185 contig MUFY01000151 (99.9% identical). The resulting genes - T66011701 encoding pfaA, T66011702 encoding pfaC, T66011703 encoding pfaD, and T66011704 encoding glutamine synthase replaced the partial genes and were included in the template file for RNA-Seq analysis.

---

<sup>1</sup> Meesapyodsuk, D. & Qiu, X (2016) Biosynthetic mechanism of very long chain polyunsaturated fatty acids in *Thraustochytrium* sp. 26185. *J. Lipid Res.* **57**, 1854-1864.

<sup>2</sup> Zhao, X. M., Dauenpen, M., Qu, C. M. & Qiu, X. (2016) Genomic analysis of genes involved in the biosynthesis of very long chain polyunsaturated fatty acids in *Thraustochytrium* sp 26185. *Lipids* **51**, 1065-1075.
